# Supplementary material
Source: PubMed Central journal article supplement (PMC5023009)
Supplement: NIHMS655774-supplement-PB016008_suppfigure1_pdf.pdf [file NIHMS655774-supplement-PB016008_suppfigure1_pdf.pdf]

# Supplementary Figure 1

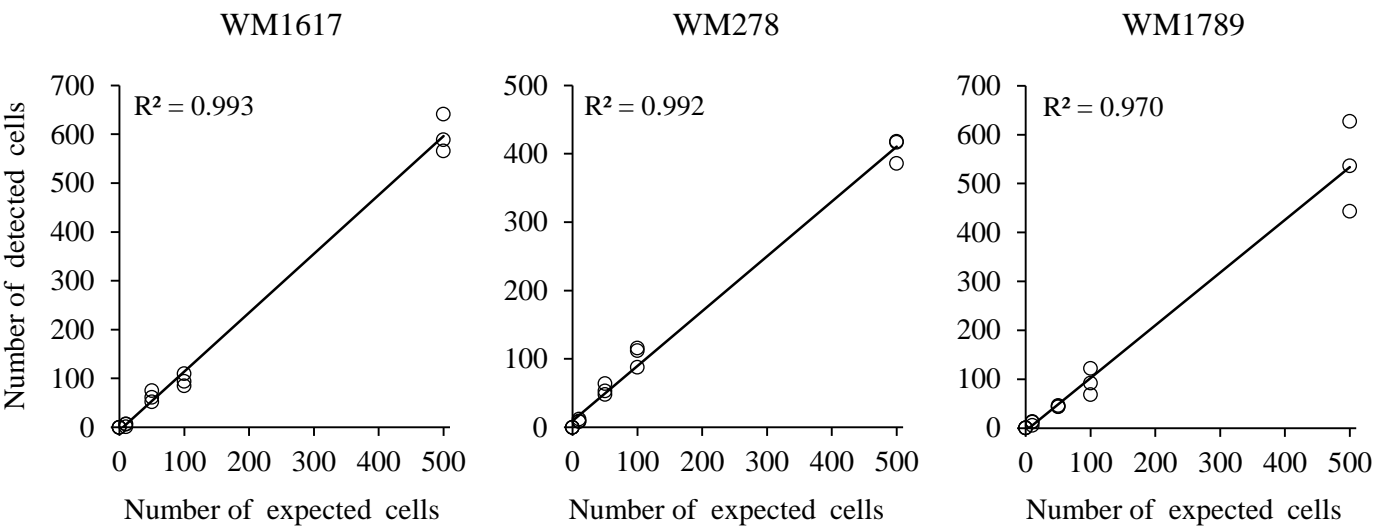

| WM1617<br>spiked | Median<br>[range] | Average<br>recovery % |
|------------------|-------------------|-----------------------|
| 0                | 0                 | 100                   |
| 10               | 6 [1,7]           | 47                    |
| 50               | 61 [52,75]        | 125                   |
| 100              | 94 [85,110]       | 96                    |
| 500              | 589 [565,641]     | 120                   |

| WM278<br>spiked | Median<br>[range] | Average<br>recovery % |
|-----------------|-------------------|-----------------------|
| 0               | 0                 | 100                   |
| 10              | 9 [8,12]          | 97                    |
| 50              | 53 [48,64]        | 110                   |
| 100             | 112 [88,116]      | 105                   |
| 500             | 417 [386,418]     | 81.4                  |

| WM1789<br>spiked | Median<br>[range] | Average<br>recovery % |
|------------------|-------------------|-----------------------|
| 0                | 0                 | 100                   |
| 10               | 12 [5,13]         | 100                   |
| 50               | 44 [43,46]        | 89                    |
| 100              | 92 [68,120]       | 93                    |
| 500              | 536 [443,627]     | 107                   |
