# Supplementary material
Source: PubMed Central journal article supplement (PMC5023009)
Supplement: NIHMS655774-supplement-PB016008_supptable1_pdf.pdf [file NIHMS655774-supplement-PB016008_supptable1_pdf.pdf]

# Supplementary Table 1

| Patient | Amplicon # | Clone | Frequency     | Wide peak boundaries        | Size (bp) | # genes | Putative Genes                                                                                                                                                                                                                                                       |
|---------|------------|-------|---------------|-----------------------------|-----------|---------|----------------------------------------------------------------------------------------------------------------------------------------------------------------------------------------------------------------------------------------------------------------------|
| 30      | 1          |       | 33/37 (89.1%) | chr19:38,380,135-40,960,857 | 2,580,722 | 41      | <b>PPP1R14A, SPINT2, KCNKG6, CATSPERG, PSMD8, GGN, SPRED3, RASGRP4, GALS4, ECH1, HNRNPL, SIRT2, NFKBIB, SARS2, MRPS12, FBXO17, PAPL, PAK4, IFNL3, IFNL2, IFNL1, PAF1, MED29, DLL3, SELV, LGALS13, LGALS14, CLC, DYRK1B, MAP3K10, AKT2, PLD3, PRX, SERTAD3, BLVRB</b> |
| 37      | 1          | B     | 14/14 (100%)  | chr12:17,674,674-18,521,711 | 847,037   | 3       | <b>PIK3C2G, MIR3974, RERGL</b>                                                                                                                                                                                                                                       |
|         |            | A     | 1/4 (25%)     | chr12:18,391,128-18,521,711 | 130,583   | 1       | <b>PIK3C2G</b>                                                                                                                                                                                                                                                       |
| 37      | 2          | B     | 14/14(100%)   | chr12:31,157,329-31,536,371 | 379,042   | 4       | <b>DDX11, FAM60A, FL13224, DENND5B</b>                                                                                                                                                                                                                               |
|         | 3          | B     | 14/14(100%)   | chr12:60,937,538-61,071,664 | 134,126   | 0       | None found/uncharacterized region                                                                                                                                                                                                                                    |
| 37      | 4          | B     | 14/14 (100%)  | chr12:70,904,304-72,651,749 | 1,747,445 | 13      | <b>PTPRB, TSPAN8, LGR5, ZFC3H1, THAP2, TMEM19, RAB21, TBC1D15, MRS2P2, TPH2, TRHDE-AS1</b>                                                                                                                                                                           |
|         |            | A     | 2/4 (50%)     | chr12:72,252,193-72,385,489 | 133,296   | 2       | <b>TBC1D15, TPH2</b>                                                                                                                                                                                                                                                 |
| 37      | 5          | B     | 14/14(100%)   | chr17:34,901,963-35,174,807 | 272,844   | 3       | <b>GGNBP2, DHRS11, MRM1</b>                                                                                                                                                                                                                                          |
| 37      | 6          | B     | 14/14(100%)   | chr17:49,280,335-49,970,050 | 689,715   | 2       | <b>CA10, MBTD1</b>                                                                                                                                                                                                                                                   |
|         |            | A     | 1/4(25%)      | chr17:49,430,673-49,709,955 | 279,282   | 1       | <b>CA10</b>                                                                                                                                                                                                                                                          |
| 37      | 7          | A     | 2/4(50%)      | chr17:58,542,508-60,115,668 | 1,573,160 | 10      | <b>APPBP2, PPM1D, BCAS3, TBX2, TBX4, NACA2, BRIPI, INTS2, INTS2, MED13</b>                                                                                                                                                                                           |
