# Supplementary material
Source: PubMed Central journal article supplement (PMC5023009)

# Supplementary Figure 2

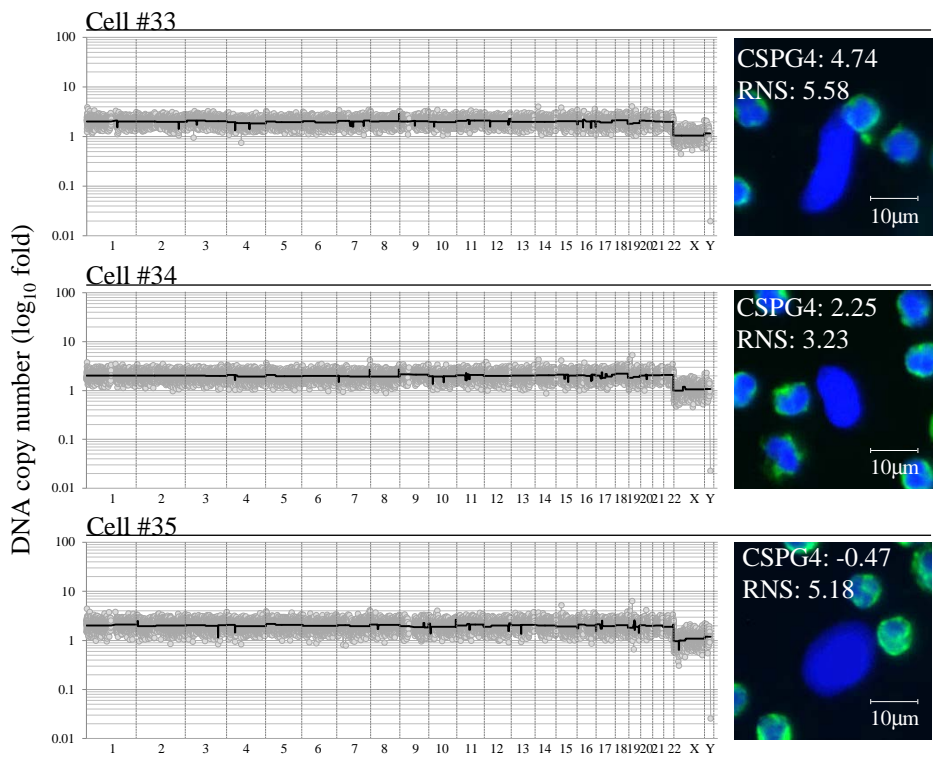

Supplement: NIHMS655774-supplement-PB016008_suppfigure2_pdf.pdf [file NIHMS655774-supplement-PB016008_suppfigure2_pdf.pdf]
